# Supplementary material for: DUOX2-Induced Oxidative Stress Inhibits Intestinal Angiogenesis through MMP3 in a Low-Birth-Weight Piglet Model
Source: MDPI journal article supplement (doi:10.3390/antiox12101800), 2023-09-25
Supplement: s1 [file s1]

Supplementary Table S1. Primers used for real-time PCR

| Genes         | Primers | Sequences (5' to 3' )           |
|---------------|---------|---------------------------------|
| ATF4          | Forward | AACATGGCCGAGATGAGCTTCC          |
|               | Reverse | TCTCCACCATCCAGTCTGTCCC          |
| ATF6          | Forward | CTCAGCTCATGGCTGTCCAA            |
|               | Reverse | AATGTGTCTCCCCTTCTGCG            |
| bFGF          | Forward | TCAAAGGAGTGTGTGCGAAC            |
|               | Reverse | CAGGGCCACATACCAACTG             |
| CD31          | Forward | AACCTCGCCCATTTCCTACC            |
|               | Reverse | CTGTTTTCCACTAAATCAGGGTC         |
| CHOP          | Forward | TTAAGTGTGACAAGGAGAAGAAC         |
|               | Reverse | CAAGGAAGGCAGAATAGAAGC           |
| CytB          | Forward | ATGAAACATTGGAGTAGTCCTACTATTTACC |
|               | Reverse | CTACGAGGTCTGTTCCGATATAAGG       |
| Claudin 1     | Forward | CTAGTGATGAGGCAGATGAA            |
|               | Reverse | AGATAGGTCCGAAGCAGAT             |
| GRP78         | Forward | AGTCCCGCAGATTGAAGTCA            |
|               | Reverse | TCTTCAGGTGTCAGGCGATT            |
| MMP2          | Forward | ACTCCCACTTTGACGACGAT            |
|               | Reverse | CGTACTTGCCATCCTTGTCG            |
| MMP9          | Forward | GGTGGACTATGTGGGCTACG            |
|               | Reverse | AGTGCTGAAGCAGGACGAG             |
| SLC1A5        | Forward | GATTGTGGAGATGGAGGATGTGG         |
|               | Reverse | TGCGAGTGAAGAGGAAGTAGATGA        |
| SLC7A2        | Forward | TGCCCATACTTCCCGTCC              |
|               | Reverse | GGTCCAGGTTACCGTCAG              |
| SLC7A5        | Forward | TTTGTTATGCGGAACTGG              |
|               | Reverse | AAAGGTGATGGCAATGAC              |
| SLC7A7        | Forward | TTTGTTATGCGGAACTGG              |
|               | Reverse | AAAGGTGATGGCAATGAC              |
| SLC7A9        | Forward | CACAACAACCTGCGAGAAGGA           |
|               | Reverse | CCGTTGATAAGCGTCAGGAT            |
| SLC36A1       | Forward | TGTGGACTTCTTCCTGATTGTC          |
|               | Reverse | CGTTGTTGTGGCAGTTGTTGGT          |
| SLC38A2       | Forward | TACTTGTTCTGCTGGTGTCC            |
|               | Reverse | GTTGTGGGCTGTGTAAAGGTG           |
| Occludin      | Forward | GAGTGATTCGGATTCTGTCT            |
|               | Reverse | TAGCCATAACCATAGCCATAG           |
| PDGF-C        | Forward | GGAGTACAAGATCCCCAGCA            |
|               | Reverse | TCCAGCCCCAAATCTCTCATC           |
| TGF-1 $\beta$ | Forward | CAAGGTCCTGGCTCTGTACA            |
|               | Reverse | CAGGAACGCACGATCATGTT            |
| VEGF-A        | Forward | CCTCGGAGCGGAGAAAGCAT            |

|          |         |                          |
|----------|---------|--------------------------|
| 18S rRNA | Reverse | TGTCACATCTGCAAGTACGTTTCG |
|          | Forward | ATTCCGATAACGAACGAGACT    |
| XBP-1    | Reverse | GGACATCTAAGGGCATCACAG    |
|          | Forward | GCCTCCCCTTCTTCATCACT     |
| Keap1    | Reverse | TTTCTCTGAGGGGCTGGAAG     |
|          | Forward | CGTGGAGACAGAAACGTGGA     |
| GLUT1    | Reverse | CAATCTGCTTCCGACAGGGT     |
|          | Forward | CCTTCAGCCAGCAGTGATG      |
| GLUT3    | Reverse | AGCGTGGGATGTGGGTAAAG     |
|          | Forward | GCCTTGACCTTTCCCATAGACA   |
| GLUT4    | Reverse | CTACTTCCACCCAGAGCAAAGT   |
|          | Forward | TCTCCAACCTGGACCTCGAATTT  |
| VEGFR2   | Reverse | CCGCACAGTTGCTCCACATA     |
|          | Forward | GATGCTCGCCTCCCTTTGA      |
|          | Reverse | AGTTCCTTCTTTCAGTCGCCTACA |

---

Table S2. Differentially expressed genes in jejunum between CON and LBW groups

| Gene_name | LBW group    |              |              |              |              | CON group    |              |              |              |              | JNvsJL_log2<br>Fold Change | JNvsJL P-<br>value |
|-----------|--------------|--------------|--------------|--------------|--------------|--------------|--------------|--------------|--------------|--------------|----------------------------|--------------------|
|           | JL1_fp<br>km | JL2_fp<br>km | JL3_f<br>pkm | JL4_fp<br>km | JL5_fp<br>km | JN1_fp<br>km | JN2_fp<br>km | JN3_fp<br>km | JN4_fp<br>km | JN5_fp<br>km |                            |                    |
| NOX1      | 0.013        | 0.000        | 0.000        | 0.104        | 0.061        | 0.000        | 0.410        | 0.077        | 0.000        | 2.047        | 3.823                      | 0.058              |
| NOX3      | 0.000        | 0.000        | 0.000        | 0.000        | 0.000        | 0.000        | 0.000        | 0.000        | 0.000        | 0.000        | -                          | -                  |
| NOX4      | 0.335        | 0.567        | 0.273        | 1.021        | 0.616        | 1.278        | 0.495        | 0.638        | 0.938        | 1.003        | 0.629                      | 0.113              |
| NOX5      | 0.135        | 0.584        | 0.261        | 0.041        | 0.217        | 0.230        | 0.520        | 0.314        | 0.150        | 0.521        | 0.492                      | 0.397              |
| DUOX1     | 0.000        | 0.000        | 0.000        | 0.000        | 0.000        | 0.000        | 0.000        | 0.000        | 0.000        | 0.000        | -                          | -                  |
| DUOX2     | 18.062       | 0.600        | 8.343        | 83.877       | 16.581       | 1.733        | 2.877        | 1.290        | 2.722        | 8.557        | -2.891                     | 0.003              |
| DUOXA2    | 3.532        | 0.137        | 1.390        | 15.368       | 2.673        | 0.432        | 0.272        | 0.092        | 0.491        | 0.693        | -3.544                     | 0.000              |
| FGF1      | 2.398        | 1.422        | 1.947        | 2.224        | 1.769        | 0.973        | 0.572        | 0.113        | 1.168        | 1.167        | -1.289                     | 0.005              |
| VEGFA     | 23.559       | 33.182       | 25.22<br>1   | 22.659       | 20.408       | 34.903       | 31.185       | 42.300       | 68.509       | 41.745       | 0.807                      | 0.001              |
| FGFBP1    | 19.668       | 11.178       | 8.812        | 24.590       | 22.534       | 0.471        | 0.473        | 0.112        | 1.815        | 1.119        | -4.440                     | 0.000              |
| FGFR3     | 15.056       | 20.959       | 20.44<br>7   | 16.218       | 25.285       | 30.852       | 38.988       | 47.646       | 44.600       | 41.721       | 1.057                      | 0.000              |
| IGF1      | 0.454        | 0.292        | 0.232        | 0.443        | 0.297        | 1.777        | 0.948        | 0.435        | 0.270        | 0.531        | 1.204                      | 0.012              |
| IGF2R     | 12.500       | 15.690       | 11.75<br>4   | 14.451       | 13.525       | 27.421       | 24.313       | 33.605       | 18.894       | 19.599       | 0.866                      | 0.000              |
| ETFDH     | 11.303       | 14.540       | 12.38<br>8   | 12.163       | 15.488       | 14.661       | 20.250       | 17.751       | 19.042       | 10.799       | 0.325                      | 0.129              |
| GCH1      | 3.386        | 7.611        | 5.473        | 4.293        | 7.996        | 8.203        | 16.462       | 18.822       | 13.158       | 11.900       | 1.253                      | 0.000              |
| NQO1      | 41.871       | 13.491       | 8.244        | 80.811       | 12.666       | 7.040        | 7.410        | 8.485        | 7.633        | 5.128        | -2.138                     | 0.000              |
| PNPT1     | 4.948        | 16.942       | 7.523        | 8.072        | 14.326       | 4.127        | 4.351        | 2.930        | 5.011        | 4.343        | -1.319                     | 0.000              |
| SOD3      | 26.777       | 28.782       | 20.89<br>4   | 8.169        | 20.827       | 43.656       | 32.178       | 57.557       | 33.648       | 23.738       | 0.856                      | 0.014              |
| CAT       | 18.941       | 40.920       | 20.91<br>9   | 24.513       | 32.843       | 74.450       | 60.607       | 77.189       | 38.785       | 34.881       | 1.050                      | 0.001              |
| OCEL1     | 28.175       | 22.316       | 28.75<br>2   | 13.933       | 15.823       | 32.909       | 35.755       | 62.240       | 46.342       | 31.776       | 0.940                      | 0.001              |
| CLDN15    | 0.720        | 0.899        | 1.060        | 0.647        | 0.556        | 1.774        | 1.589        | 1.230        | 1.017        | 2.008        | 0.977                      | 0.000              |
| CD58      | 4.847        | 7.218        | 4.370        | 6.590        | 6.733        | 10.404       | 11.041       | 9.956        | 8.119        | 8.038        | 0.676                      | 0.001              |
| KRT8      | 1426.7<br>26 | 588.14<br>6  | 732.9<br>95  | 633.97<br>8  | 920.24<br>3  | 291.77<br>1  | 423.86<br>3  | 417.70<br>1  | 624.38<br>8  | 561.81<br>3  | -0.891                     | 0.003              |
| CLDN3     | 630.08<br>5  | 680.76<br>0  | 864.7<br>89  | 361.99<br>9  | 675.14<br>5  | 559.25<br>0  | 793.20<br>1  | 1348.4<br>93 | 1444.6<br>48 | 1293.0<br>74 | 0.759                      | 0.016              |
| PRDX5     | 15.691       | 14.971       | 12.90<br>3   | 8.873        | 17.216       | 23.625       | 30.155       | 39.958       | 30.796       | 22.764       | 1.080                      | 0.000              |
| PRDX6     | 86.702       | 58.153       | 85.01<br>2   | 145.12<br>3  | 76.970       | 47.212       | 50.462       | 60.363       | 59.425       | 36.699       | -0.831                     | 0.002              |
| PRDX6     | 86.702       | 58.153       | 85.01<br>2   | 145.12<br>3  | 76.970       | 47.212       | 50.462       | 60.363       | 59.425       | 36.699       | -0.831                     | 0.002              |

|       |        |        |       |        |        |        |        |        |        |        |        |       |
|-------|--------|--------|-------|--------|--------|--------|--------|--------|--------|--------|--------|-------|
| PRDX1 | 344.04 | 433.55 | 365.3 | 293.45 | 432.76 | 238.19 | 279.55 | 265.06 | 335.72 | 254.75 | -0.445 | 0.013 |
|       | 4      | 7      | 94    | 1      | 8      | 2      | 0      | 5      | 5      | 5      |        |       |
